# Supplementary material
Source: publisher figshare collection journal article supplement (https://acs.figshare.com/ndownloader/files/4016122)
Supplement: Supplementary file 1 [file 4016122]

# **SUPPORTING INFORMATION**

## **Roughness and Salt Annealing in a Polyelectrolyte Multilayer**

Ramy A. Ghostine<sup>1</sup>, Rana M. Jisr<sup>2</sup>, Ali Lehaf<sup>1</sup>, Joseph B. Schlenoff<sup>1\*</sup>

<sup>1</sup>Department of Chemistry and Biochemistry, The Florida State University, Tallahassee,

Fl 32306-4390, <sup>2</sup>Department of Physics and Chemistry, West Virginia University

Institute of Technology, WV, Montgomery, 25316

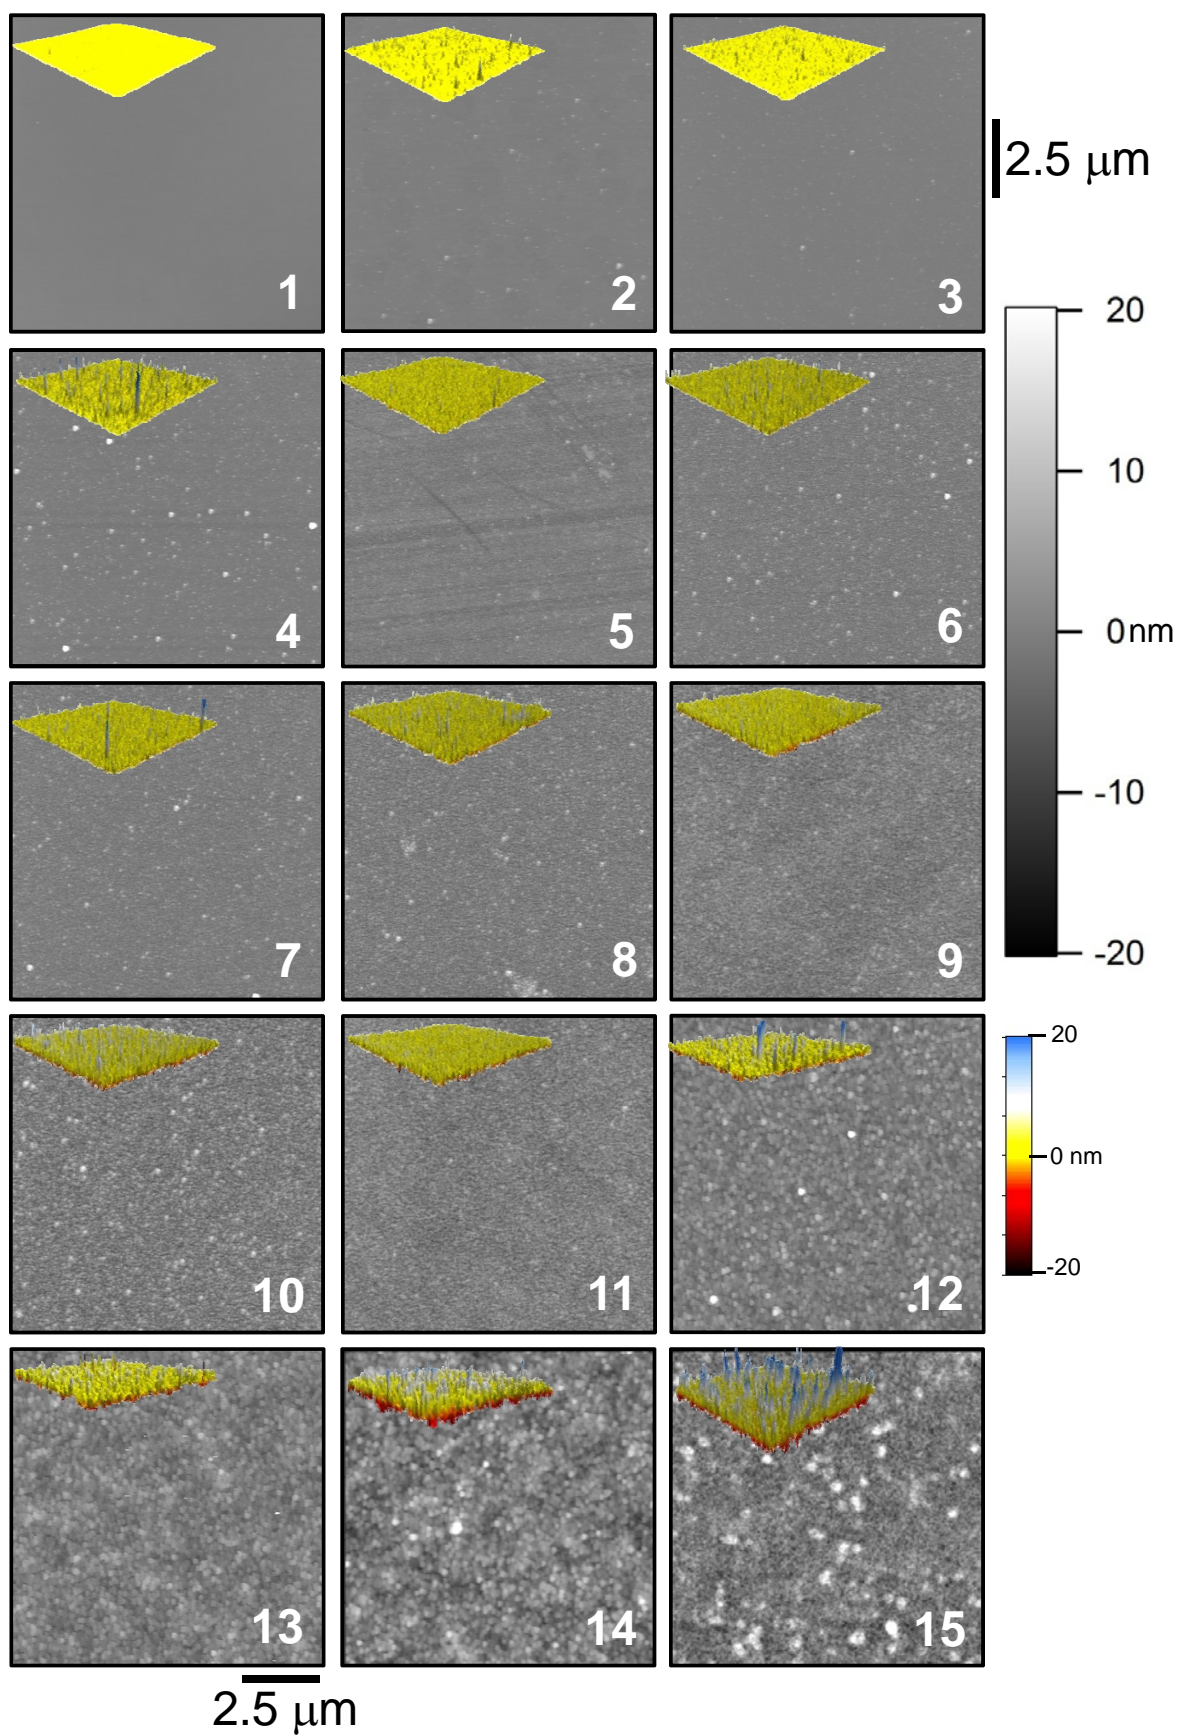

**Figure S1** AFM images,  $10\ \mu\text{m} \times 10\ \mu\text{m}$ , of the surface of PDADMA/PSS multilayer after each layer deposited from 0.5 M NaCl (from 1 to 15 layers). The number of layers is given on each panel. The 3D plot is shown in yellow at the upper corner of each image.

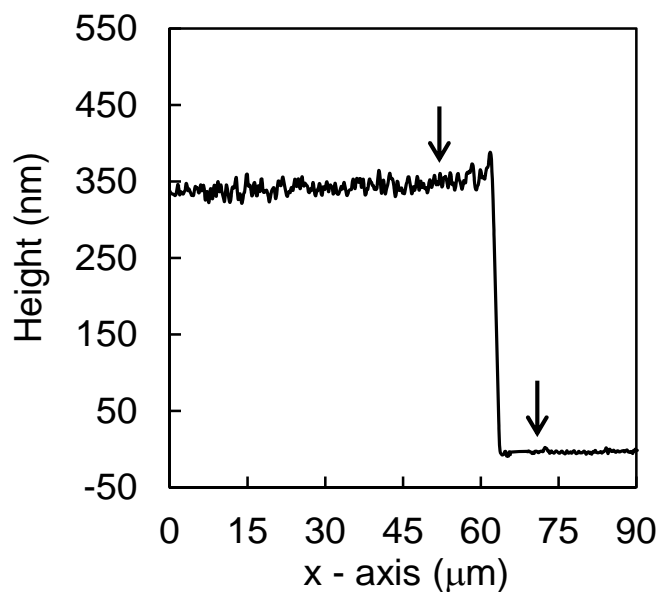

**Figure S2.** Step height of a 30-layer PDADMA/PSS multilayer built from 1.0 M NaCl scratched after annealing in 1.0 M NaCl for 20 h. The tip was scanned over the scratch to obtain the thickness of the film (marked by the arrows).

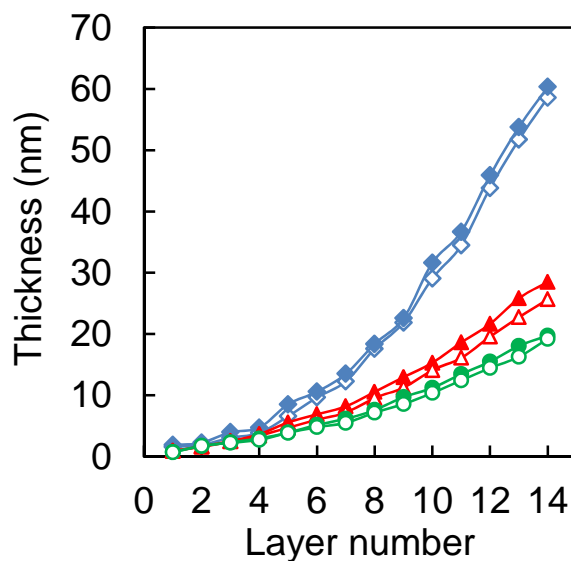

**Figure S3** Thickness of PDADMA/PSS polyelectrolyte films built separately on different Si wafers until the desired number of layers was reached. PDADMA and PSS in 0.5 (◆;◇), 0.25 (▲;△), and 0.1 (●;○) M NaCl solution. The solid symbols correspond to the thicknesses directly after buildup, and the open symbols correspond to those after annealing in 1.0 M NaCl for 20 h.

| PSS M <sub>w</sub> | Initial Thickness (nm) | Thickness after Annealing in 1.0M NaCl | Thickness after Annealing in 1.4M NaCl |
|--------------------|------------------------|----------------------------------------|----------------------------------------|
| 58,000             | 601                    | 598                                    | 597                                    |
| 65,000             | 505                    | 503                                    | 503                                    |
| 126,700            | 230                    | 222                                    | 216                                    |
| 262,600            | 93                     | 90                                     | 89                                     |
| 505,100            | 100                    | 108                                    | 100                                    |
| 2,260,000          | 78                     | 78                                     | 77                                     |

**Table S1.** Ellipsometric thickness in nm *versus* molecular weight of PSS in (PDADMA/PSS)<sub>22</sub> PEMUs built from 1.0 M NaCl. Initial thickness and the thicknesses after annealing in 1.0 M NaCl for 24 h then further annealing in 1.4M NaCl for 24 h are tabulated.

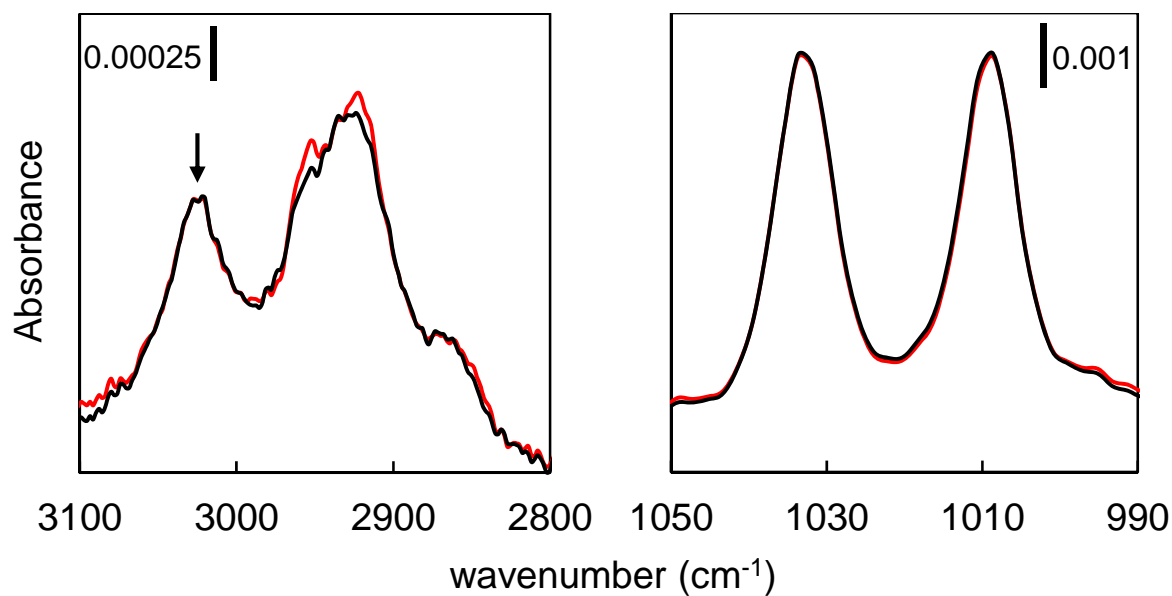

**Figure S4.** FTIR spectra of (PDADMA/PSS)<sub>7</sub>PDADMA PEMU @ 0.5 M NaCl showing the C-H region that corresponds to PDADMA (left, marked with the arrow), and sulfonate bands that correspond to PSS (right), before (red) and after (black) annealing in 1.0 M NaCl for 20 h. Within error, no loss of material can be detected. Scale bars are absorbance units.

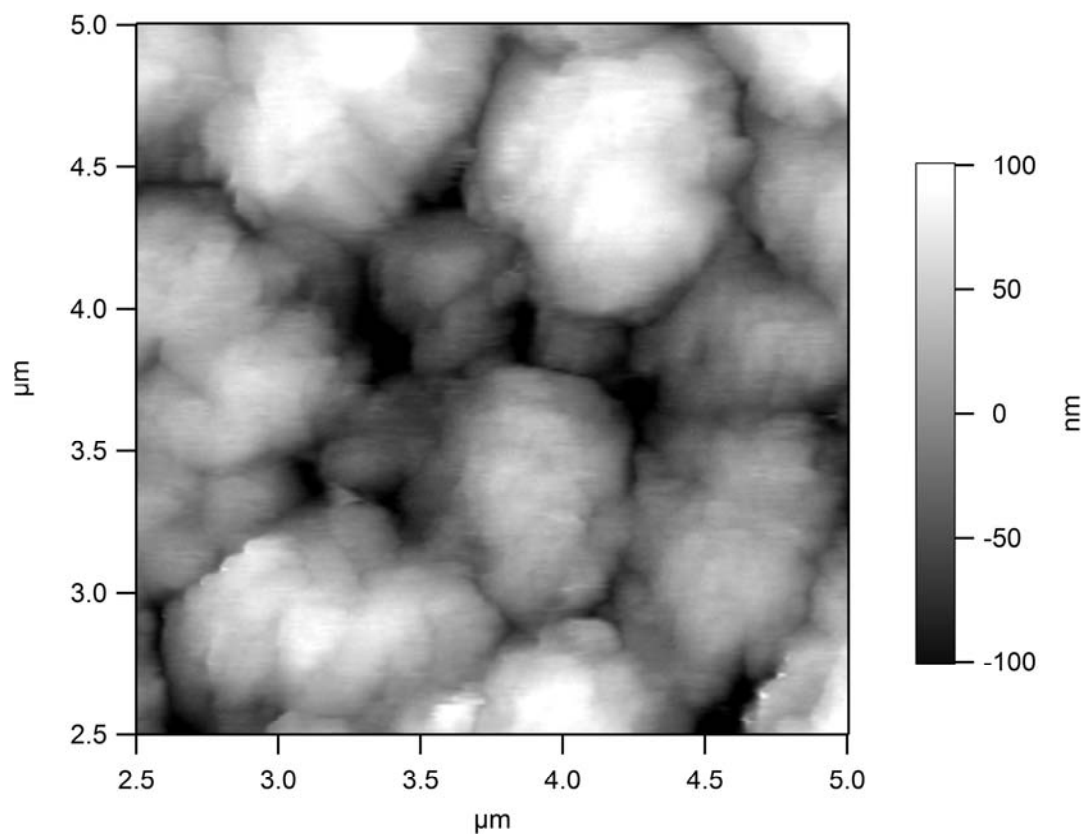

**Figure S5.** Zoom-in of the AFM image of the 15-layer (PDADMA-capped) PEMU from Figure 12, taken under 10 mM NaCl, showing additional detail.
